1 **Superior Colliculus-Projected GABAergic Retinal Ganglion Cells Mediate Looming-**  
2 **Evoked Flight Response**

3 Xue Luo<sup>1\*</sup>, Danrui Cai<sup>1\*</sup>, Kejiong Shen<sup>1</sup>, Qinqin Deng<sup>1</sup>, Xinlan Lei<sup>1</sup>, Sen Jin<sup>2</sup>, Wen-Bo  
4 Zeng<sup>3</sup>, Hua Li<sup>4</sup>, Fuqiang Xu<sup>5,6</sup>, Lu Huang<sup>7,8</sup>, Chaoran Ren<sup>8,9</sup>, Min-Hua Luo<sup>3</sup>, Ting Xie<sup>4,10#</sup>,  
5 Yin Shen<sup>1,11#</sup>

6 <sup>1</sup>Eye center, Renmin Hospital of Wuhan University, Wuhan, 430060, Hubei, China

7 <sup>2</sup>HUST-Suzhou Institute for Brainsmatics, JITRI Institute for Brainsmatics, Suzhou 215125,  
8 China

9 <sup>3</sup>State Key Laboratory of Virology, CAS Center for Excellence in Brain Science and  
10 Intelligence Technology (CEBSIT), Wuhan Institute of Virology, Chinese Academy of  
11 Sciences, Wuhan 430071, China

12 <sup>4</sup>Stowers Institute for Medical Research, 1000 East 50th Street, Kansas City, MO 64110, USA

13 <sup>5</sup>Brain Cognition and Brain Disease Institute (BCBDI), Shenzhen Institutes of Advanced  
14 Technology, Chinese Academy of Sciences, Shenzhen-Hong Kong Institute of Brain Science-  
15 Shenzhen Fundamental Research Institutions, Shenzhen 518055, China

16 <sup>6</sup>Centre for Brain Science, State Key Laboratory of Magnetic Resonance and Atomic  
17 Molecular Physics, Key Laboratory of Magnetic Resonance in Biological Systems, Wuhan  
18 Institute of Physics and Mathematics, CAS Centre for Excellence in Brain Science and  
19 Intelligence Technology, Chinese Academy of Sciences, Wuhan 430071, China

20 <sup>7</sup>Department of Neurology and Stroke Center, The First Affiliated Hospital of Jinan

21 University, Guangzhou 510632, China

22 <sup>8</sup>Guangdong-Hongkong-Macau Institute of CNS Regeneration, Ministry of Education CNS

23 Regeneration Collaborative Joint Laboratory, Jinan University, Guangzhou 510632, China

24 <sup>9</sup>Guangzhou Regenerative Medicine and Health Guangdong Laboratory, Guangzhou 510530,

25 China

26 <sup>10</sup>Department of Anatomy and Cell Biology, University of Kansas School of Medicine, 3901

27 Rainbow Blvd, Kansas City, KS 66160, USA

28 <sup>11</sup>Medical Research Institute, Wuhan University, Wuhan, 430071, China

29 \*These authors contributed equally

30 #Correspondence:

31 Yin Shen, [yinshen@whu.edu.cn](mailto:yinshen@whu.edu.cn). Eye center, Wuhan University Renmin Hospital, Medical

32 Research Institute, Wuhan University, Wuhan, 430060, Hubei, China

33 Ting Xie, [tgx@stowers.org](mailto:tgx@stowers.org). Department of Anatomy and Cell Biology, University of Kansas

34 School of Medicine, 3901 Rainbow Blvd, and Stowers Institute for Medical Research, 1000

35 East 50th Street, Kansas City, MO 64110, USA

36 **Grant support:**

37 This work was supported by grants from the National Key R&D Program of China

38 (2017YFE013400 to Y.S.), the National Nature Science Foundation of China (81470628 Y. S.

39 81800872 to Q.D.) and The Stowers SIMR fund (to T. X.).

40 **Running title:** spgRGCs mediate innate fear response

41 **Key words:** spgRGCs, innate defensive behavior, GABA, looming, superior colliculus, flight

42 response

## 43 **Abstract**

44       The looming stimulus-evoked flight response is an experimental paradigm for studying  
45 innate defensive behaviors. However, how the visual looming stimulus is transmitted from the  
46 retina to the brain remains poorly understood. Here, we report that superior colliculus (SC)-  
47 projected GABAergic RGCs (spgRGCs) transmit the looming signal from the retina to the  
48 brain to mediate the looming-evoked flight behavior by releasing GABA. In the mouse retina,  
49 GABAergic RGCs are capable of projecting to many brain areas, including the SC. spgRGCs  
50 are mono-synaptically connected to the parvalbumin-positive SC neurons known to be  
51 required for the looming-evoked flight response. Optogenetic activation of spgRGCs triggers  
52 GABAergic responses in SC neurons. The ablation or silence of spgRGCs compromises  
53 looming-evoked flight response but not image-forming functions. Therefore, this study shows  
54 that spgRGCs control the looming-evoked flight response by regulating SC neurons via  
55 GABA, providing novel insight into the regulation of innate defensive behaviors.

## 56 **Introduction**

57       The ability to detect the naturally occurring looming stimulus, which mimics  
58       approaching objects, is a conserved innate defensive behavior important for the survival of  
59       animal species, ranging from *Drosophila* to mammals, including humans (Ball & Tronick,  
60       1971; Gibson et al., 2015; Schiff, Caviness, & Gibson, 1962). The looming stimulus-induced  
61       flight response in mice has been recently established as an effective model for studying innate  
62       defensive behaviors in animals (L. Huang et al., 2017; Shang et al., 2015; Yilmaz & Meister,  
63       2013). The neural circuits for mediating the looming-evoked innate defensive behavior in the  
64       mouse brain have recently been shown to involve different brain areas, including the superior  
65       colliculus (SC). However, how the looming stimulus signal is transmitted from the retina to  
66       the brain remains largely elusive.

67       The looming-evoked innate defensive behavior has recently been shown to involve the  
68       brain neural circuits mediated through the SC, the parabigeminal nucleus (PBGN), lateral  
69       posterior thalamic nucleus (LPTN), the ventral tegmental area (VTA), the zona incerta (ZI)  
70       and the amygdala in the mouse. The SC is generally believed to serve as a sensory-motor  
71       center for processing and controlling innate visual behaviors (Ito & Feldheim, 2018; Zhao,  
72       Liu, & Cang, 2014). Parvalbumin positive (PV<sup>+</sup>) glutamatergic excitatory neurons in the  
73       superficial layer of the SC project to different brain areas to mediate the looming-evoked  
74       escape and freezing behavior (Shang et al., 2015). Interestingly, the looming stimulus  
75       simultaneously activate two distinct groups of PV<sup>+</sup> GABAergic SC neurons projecting the

76 PBGN and the LPTN, which both innervate the amygdala where the fear response is initiated,  
77 to mediate escape and freezing responses, respectively (Shang et al., 2019). Also,  
78 glutamatergic SC neurons innervate and send excitatory signals to GABAergic neurons in the  
79 VTA, which further project to the central nucleus of the amygdala, mediating the looming-  
80 evoked defensive behavior (Zhou et al., 2019). Although GABAergic neurons in the ZI  
81 directly innervate excitatory neurons in the dorsolateral and ventrolateral compartments of  
82 periaqueductal gray (PAG) to drive escape and freezing responses, it remains unclear how  
83 these neurons are connected to the SC (Chou et al., 2018).

84       The visual looming stimulus must be transmitted through retinal ganglion cells (RGCs)  
85 since they are the only cell type connecting the eye to the brain. Interestingly, GABAergic  
86 DRN neurons antagonize the serotonergic DRN neurons to activate the SC-LPTN-amygdala  
87 pathway to mediate the looming-evoked flight response (L. Huang et al., 2017). It still  
88 remains unclear how the SC/DRN-projected RGCs transmit the looming stimulus signal. Here  
89 we identified SC-projected GABAergic RGCs (spgRGCs) transmit the looming stimulus  
90 signal and mediate the looming-evoked flight response by releasing GABA.

91 **Results**

92 **The mouse retina contains a population of GABAergic RGCs projecting to different**  
93 **regions of the brain**

94 Earlier studies suggest the existence of GABA-immunoreactive RGCs in turtle (Hurd &  
95 Eldred, 1989) and rabbit retinas (Yu, Watt, Lam, & Fry, 1988)(Hirano, Brandstatter, &  
96 Brecha, 2005), but their biological functions remain undefined. To confirm the existence of  
97 GABAergic RGCs in the mouse retina, the recombinant adeno-associated virus (AAV)  
98 expressing EYFP-EYFP in a Cre-dependent manner were injected into the vitreous of adult  
99 eyes of *Gad2-Cre* or *vGAT-Cre* mice, which are specifically expressed in GABAergic  
100 neurons (Chan et al., 2017; Fang, Yamaguchi, Song, Tritsch, & Lin, 2018; Garcia-Junco-  
101 Clemente et al., 2017; Milstein et al., 2015; Taniguchi et al., 2011) (Fig. 1A). In addition to  
102 EYFP-labeled GABAergic amacrine cells in the inner nuclear layer (INL), EYFP-labeled  
103 GABAergic RGCs in the ganglion cell layer (GCL) also existed based on their EYFP-positive  
104 optic nerve and laminar positions (Baden et al., 2016; Pang & Wu, 2011; Zhang, Kolodkin,  
105 Wong, & James, 2017) (Fig. 1B). Those EYFP-labeled RGCs were not caused by virus  
106 leakage since there were no EYFP-labeled retinal cells in negative controls (Fig. S1).  
107 Consistently, 13% of RGCs (n=6225) are positive for *Gad2* mRNA expression based on the  
108 previously published scRNA results (Rheaume et al., 2018) (Fig. 1C). Interestingly, *Gad2*  
109 mRNA is expressed in most of the identified 40 RGC subpopulations, ranging from 4% to  
110 30%. Those labeled YFP-labeled GABAergic RGCs project their axons in the optic track  
111 (Opt) in the brain, and mainly innervate the suprachiasmatic nucleus (SCN), the lateral

112 geniculate nucleus (LGN) and the SC, but not the dorsal raphe nucleus (DRN) (Fig. 1D-H). In  
113 the LGN, the axonal arbors of the GABAergic RGCs spread across the LGN, but appear to be  
114 more abundant in the dorsal side (DLG) and intergeniculate leaflet (ILG) than in the ventral  
115 side (VLG) (Fig. 1F). In the SC, the axonal arbors of GABAergic RGCs are more restricted to  
116 the superficial and intermediate layers (SL and IL) in the SC (Fig. 1G). Taken together,  
117 GABAergic RGCs exist in the adult mouse eye and are capable of projecting to the brain  
118 areas participating in image-forming and non-image-forming functions.



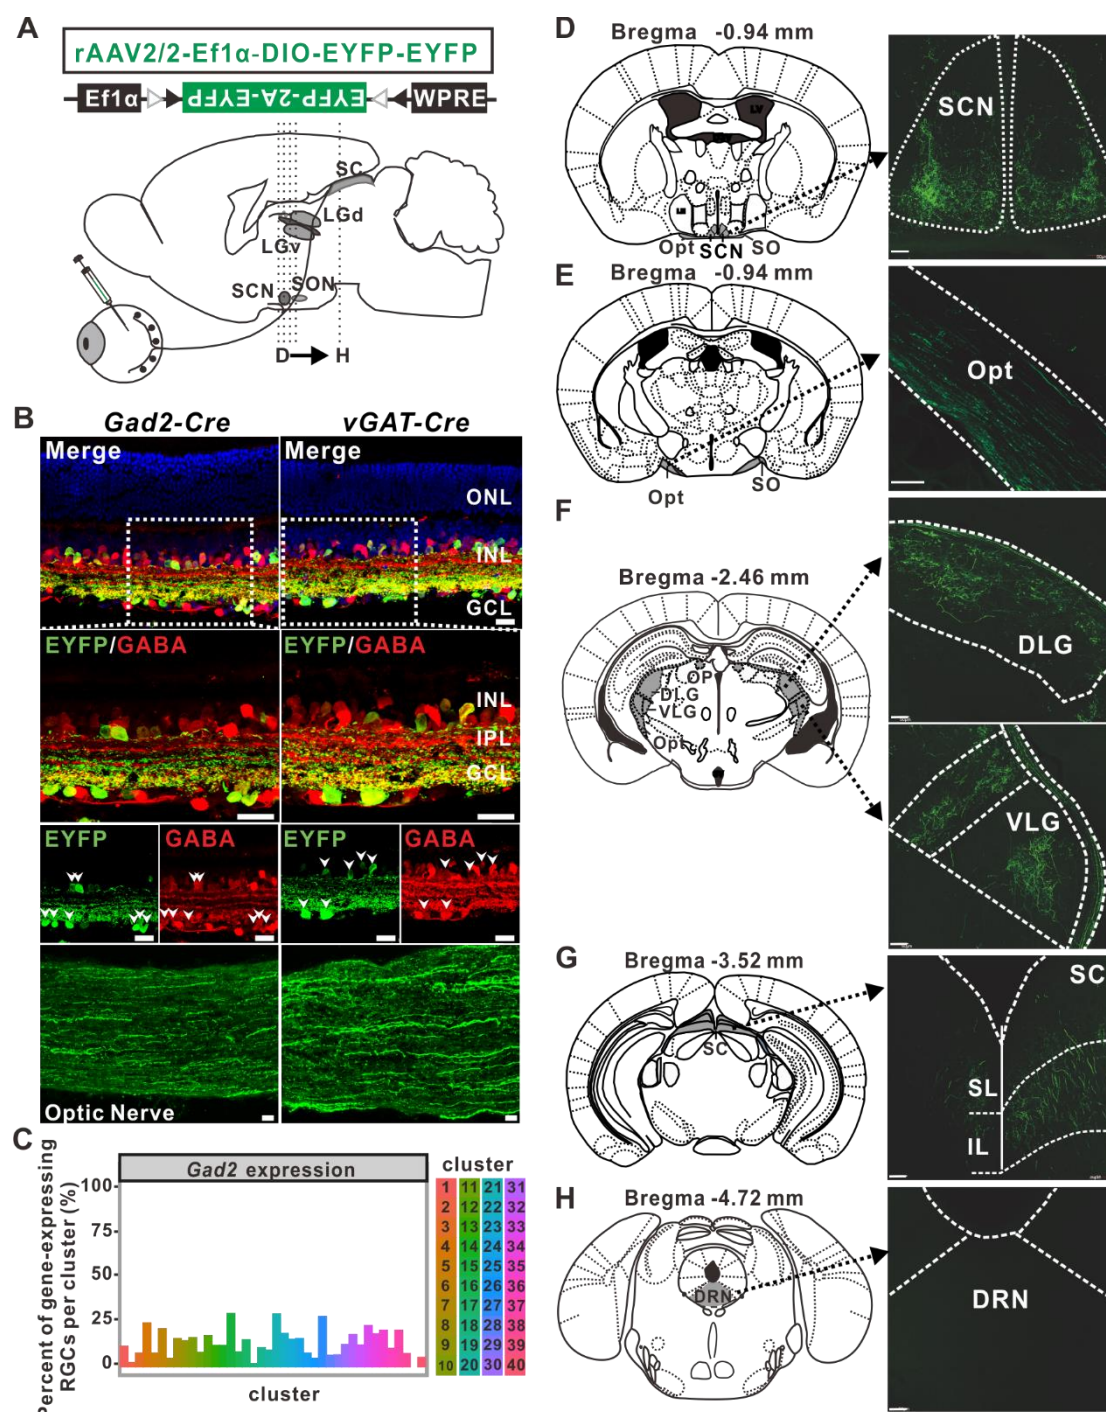

119 **Figure 1.** GABAergic RGCs project to multiple areas of the mouse brain. **(A)** Schematic  
 120 diagrams explaining the anterograde labeling of GABAergic RGCs and the gene structure for  
 121 Cre-dependent expression of two copies of EYFP in the AAV. **(B)** EYFP-labeled GABAergic  
 122 neurons in the *Gad2-Cre* (left) and *vGAT-Cre* (right) retinas. EYFP-labeled RGCs are

123 expressing gamma-aminobutyric acid (GABA) (shown in high magnifications, 100X), and  
124 can also extend EYFP-positive axons in the optic nerve (ONL: outer nuclear layer; INL: inner  
125 nuclear layer; GCL: ganglion cell layer; Scale bar: 20  $\mu$ m). (C) *Gad2* mRNA expression in  
126 mouse RGC subpopulations based on the previously published scRNA results. (D-H) Brain  
127 projections from the EYFP-labeled RGCs revealed by anterograde labeling. These  
128 retinorecipient brain regions (shown in high magnifications; right) correspond to the green-  
129 filled areas in the mouse brain atlas (left) (SCN: suprachiasmatic nucleus; Opt: optic tract;  
130 SC: superior colliculus; DLG: dorsal lateral geniculate nucleus; IGL: intergeniculate leaf;  
131 VLG: ventral lateral geniculate nucleus; DRN: dorsal raphe nucleus. Scale bar: 100  $\mu$ m).

### 132 **spgRGCs are capable of releasing GABA to elicit physiological responses in SC neurons**

133 To determine if spgRGCs can functionally release GABA to elicit post-synaptic  
134 responses in SC neurons, channel Rhodopsin 2 and EYFP fusion protein (ChR2-EYFP) were  
135 expressed in the AAV-infected GABAergic RGCs. When spgRGCs were activated by 470 nm  
136 laser light, post-synaptic SC responses were recorded (Fig. 2A and 2B). Brief pulses of light  
137 can induce sustained inward currents in the ChR2-EYFP-expressing RGCs, indicating that  
138 ChR2-EYFP can be functional in GABAergic RGCs (Fig. 2C). In the SC, light-mediated  
139 ChR2 activation in the ChR2-EYFP-expressing RGC axonal fibers induces inhibitory  
140 postsynaptic currents (IPSCs) when  $V_{\text{holding}}$  was set to 0 mV, which is close to the reversal  
141 potential for  $\text{Na}^+$  (Mitamura, Higashiyama, Taniguchi, Klagsbrun, & Mekada, 1995) (Fig. 2D  
142 and 2E). The addition of bicuculline (10  $\mu$ M), GABA<sub>A</sub> receptor antagonist, to the recording

143 bath solution (TTX+D-AP5+ CNQX) could reversibly suppress the light-evoked responses  
144 (n=26; 21.7±4.2 pA) (Fig. 2E). To further characterize the properties of CHR2-induced  
145 currents, in the all recording neurons, we also found Chr2-evoked excitatory (-70 mV) and  
146 inhibitory (0 mV) currents in some postsynaptic neurons (n=14) in the presence of TTX (Fig.  
147 S2). Our findings indicate that spgRGCs innervate and functionally inhibit SC neurons  
148 through releasing GABA.

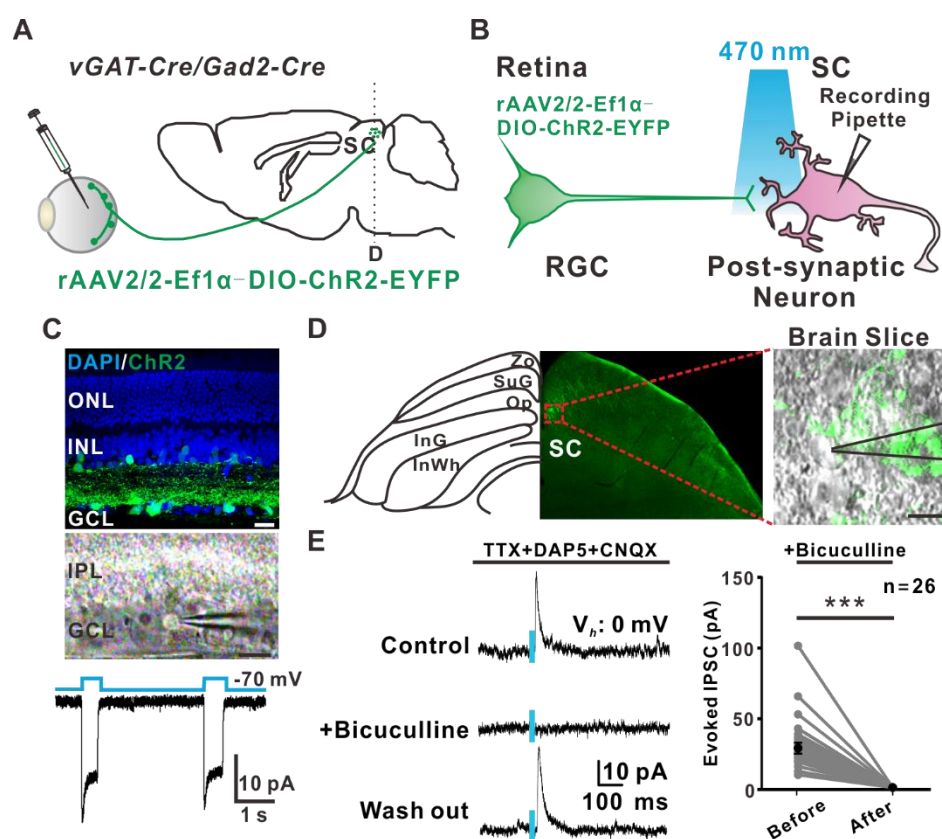

149 **Figure 2.** ChR2-mediated activation causes GABAergic RGCs to release GABA and evoke  
150 electrophysiological responses in SC neurons. (A, B) Schematic representation of optogenetic  
151 stimulation of GABAergic RGCs and recordings in labelled RGCs and SC neurons in tissue  
152 slices. (C) Patch-clamp recording of the AAV-ChR2-EYFP infected RGCs in the *vGAT-*  
153 *Cre/Gad2-Cre* retina. Light stimulation of ChR2 (470 nm, 500 ms) induces typical inward  
154 currents in the ChR2-EYFP-expressing RGCs. Scale bar: 25 μm. (D) Recording of an RGC-

155 projecting SC neuron following light-induced activation of EYFP-expressing axonal fibers  
156 (green) of GABAergic RGCs (scale bar: 10  $\mu$ m). (E) Postsynaptic IPSCs of a GABAergic  
157 RGC-projecting SC neuron in response to ChR2-mediated activation of RGCs (470nm blue  
158 light for 5 ms) are reversibly inhibited by GABA<sub>A</sub> receptor antagonist Bicuculline (10  $\mu$ M).  
159 All recordings are performed with the 0 mV holding potential ( $V_{\text{holding}}$ ) in the presence of D-  
160 AP5, strychnine, CNQX and TTX. Right: quantification results on IPSCs. Light stimulation  
161 (470 nm) is marked by a blue bar. Statistical analysis: one-way Student's t-test; \*\*\*:  $P <$   
162 0.001.

### 163 **spgRGCs are composed of ON, OFF and ON-OFF types**

164 To further characterize the distribution, dendritic morphology and light responses of the  
165 spgRGCs, Cre-dependent EYFP-EYFP-expressing AAV viruses were injected into the SC  
166 region of the *vGAT-Cre* or *Gad2-Cre* brain for retrogradely labeling spgRGCs (Fig. 3A and  
167 3B). Retrogradely labeled RGCs are GABAergic since the EYFP-labeled RGCs express  
168 GABA (n=12 mice) (Fig. 3C). By comparing to the Brn3a-positive (Brn3a<sup>+</sup>) RGCs, which are  
169 more dense in the central retina than in the peripheral retina (O'Sullivan et al., 2017), the  
170 EYFP-labeled spgRGCs showed a higher density in the peripheral retina than in the central  
171 retina (Fig. 3D-F). 74% of EYFP-labeled spgRGCs had the soma diameter smaller than 12.5  
172  $\mu$ m, which was considered to be a small RGC soma (Sun, Li, & He, 2002). Based on  
173 stratification patterns and light-induced responses, RGCs are classified into ON, OFF, and  
174 ON-OFF subtypes. spgRGCs can also be assigned into ON, OFF, and ON-OFF subtypes

175 (Sernagor, Eglén, & Wong, 2001) (ON cells: n=5; OFF cells: n=3; ON-OFF cells: n=4) based  
 176 on stratification and induced-response pattern (Fig. 3I-K). Thus, spgRGCs have different  
 177 subtypes and exhibit a preferential periphery distribution in the retina.

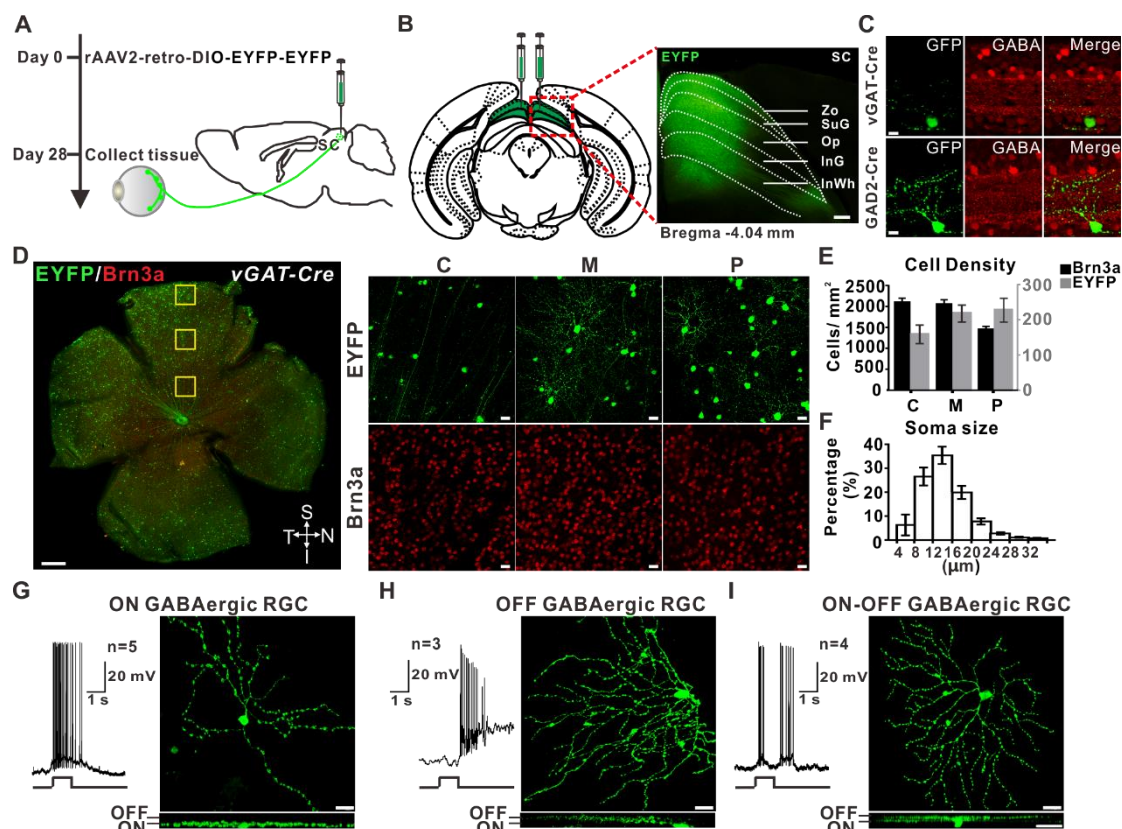

178 **Figure 3.** Morphological and functional characterization of spgRGCs. (A, B) Experimental  
 179 design: *AAV-EF1a::DIO-EYFP-EYFP* viruses are delivered into the SC to retrogradely trace  
 180 spgRGCs. Scale bar: 200 μm. (C) EYFP-labeled RGCs also express GABA. Scale bar: 200  
 181 μm. (D) Representative images of the distribution of EYFP (**upper**) or Brn3a (**lower**) positive  
 182 RGCs in the flat mount retina of *vGAT-Cre* mice (C: Center; M: Midperiphery; P: Periphery).  
 183 Highly magnified regions (40X, Scale bar: 500 μm) are shown in the right. (E) Retinal  
 184 distributions of the SC-projected GABAergic RGCs versus Brn3a<sup>+</sup> RGCs (n=24; means ±  
 185 SEM). (F) Histogram showing the soma size distribution of the SC-projected GABAergic

186 RGCs. **(G-I)** Light responses and dendritic morphologies of the SC-projected ON **(G)**, OFF  
187 **(H)** and ON-OFF **(I)** GABAergic RGCs. Top: flat view; bottom: side view. Scale bar: 20  $\mu$ m.

### 188 **spgRGCs mediate the looming-evoked flight response**

189 To further determine the downstream neurons of spgRGC-projecting SC neurons, we  
190 injected the herpes simplex virus (HSV) expressing double-floxed four copies of tandemly  
191 repeated GFP genes (HSV-LSL-TK-G4) into the vitreous of *vGAT-Cre* mice to label trans-  
192 synaptic neurons (Fig. 4A). HSV-LSL-TK-G4 is still capable of identifying potential  
193 postsynaptic targets and facilitates the identification of the cell types. GFP was detected in the  
194 SC, the PBG nucleus, the DLG (the relay center in thalamus for the visual pathway) and the  
195 pontine nucleus (Pn; involved in motor activity) in the brain (Fig. 4B). In the SC, the trans-  
196 synaptically labeled SC neurons were parvalbumin-positive (PV<sup>+</sup>) (Fig. 4B). These results  
197 indicate that spgRGCs are synaptically connected to PV<sup>+</sup> SC neurons, which are known to  
198 form the circuitry controlling the looming-induced flight behavior (Shang et al., 2019; Shang  
199 et al., 2015), suggesting that spgRGCs might be involved in the looming-evoked flight  
200 response.

201 To directly test their requirement for the looming-evoked flight behavior, we sought to  
202 selectively ablate spgRGCs by expressing diphtheria toxin subunit A (DTA), which  
203 inactivates elongation factor 2 to terminate protein synthesis and thus kill DTA-expressing  
204 cells (Collier, 2001; Mitamura et al., 1995). AAV2/2-fDIO-DTA and AAV2/retro-Efl $\alpha$  -

205 DIO-FLP viruses were injected into the vitreous and the SC of the *vGAT-Cre* or *Gad2-Cre*  
206 mice, respectively, to simultaneously infect the EYFP-labeled spgRGCs for allowing the Cre-  
207 dependent expression of FLP that then drives FRT-dependent DTA expression specifically in  
208 spgRGCs (Fig. 4C). Two months after dual virus infection, EYFP-labeled spgRGCs have  
209 been reduced by approximately 90% (before ablation/phase 1:  $204 \pm 10.68$  EYFP-positive  
210 spgRGCs/mm<sup>2</sup>, n=11; after ablation/phase 3:  $25.97 \pm 2.17$  EYFP-positive spgRGCs/mm<sup>2</sup>,  
211 n=10;  $P < 0.001$ ). In the looming stimulus-induced flight behavior test (Zhao et al., 2014),  
212 there was a significant increase in both “the time to the shelter” and “the walk distance” for  
213 the mice depleting spgRGCs (Fig. 4D-G, Supplemental Movie 1-4). Moreover, the defective  
214 looming-evoked flight response caused by spgRGC ablation persists 4 months after the  
215 ablation (Fig. 4F and 4G). Consistently, the ablation of spgRGCs significantly decreased the  
216 number of looming stimulation-induced c-Fos-positive neurons in both the SC and the PGBN,  
217 further supporting that spgRGCs are required for looming-induced neuronal activities in the  
218 SC-PGBN pathway (Fig. 4H and I). c-Fos expression is indicative of neuronal activation upon  
219 looming signaling-induced stimulation. Thus, our findings indicate that spgRGCs are required  
220 for the looming-evoked flight response by activating the SC-PGBN pathway.

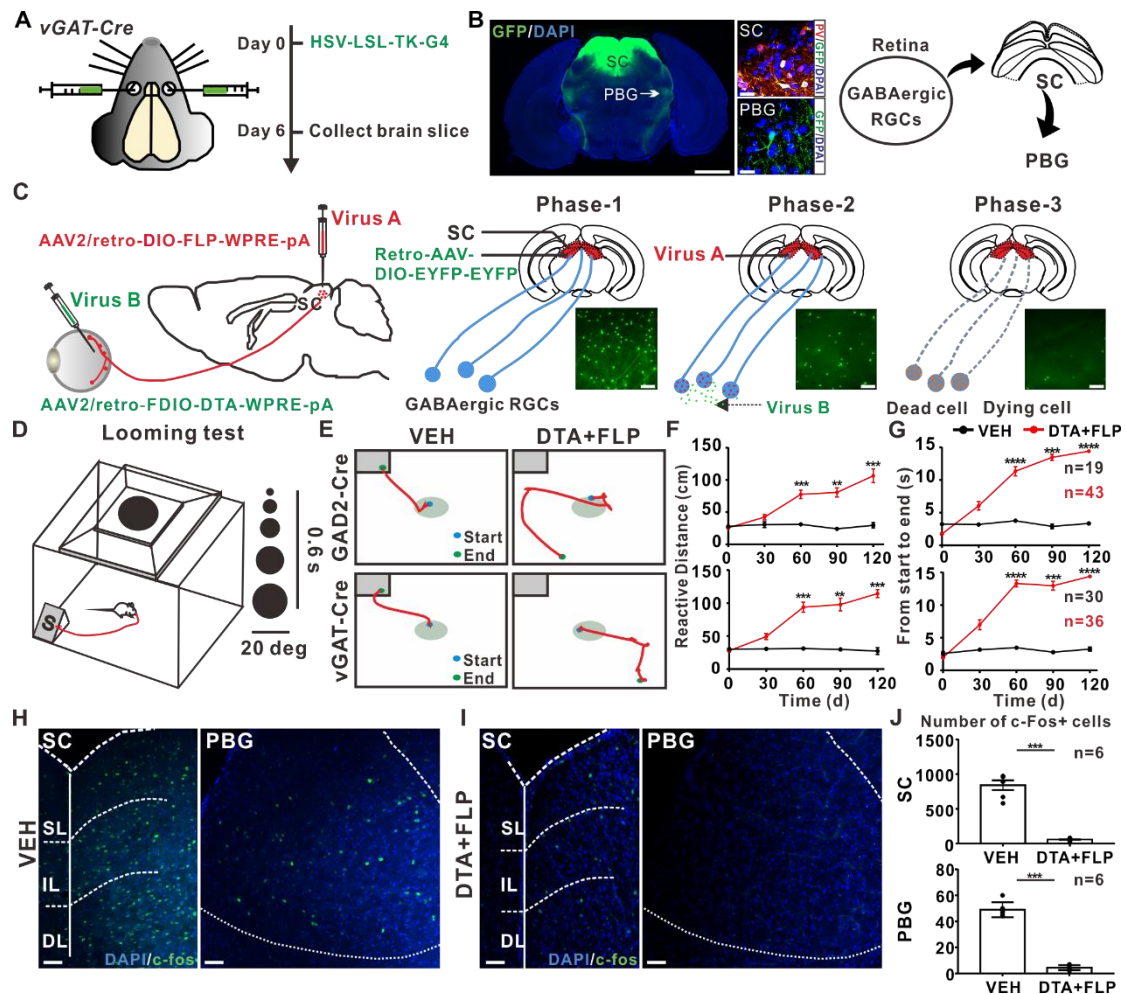

221 **Figure 4.** spgRGCs are required for the looming-evoked flight response. (A) Experiment  
 222 design for the trans-synaptic labeling of GABAergic RGCs. (B) By infecting the *Gad2-Cre* or  
 223 *vGAT-Cre* mouse eye with Cre-dependent HSV viruses, the SC, the PBG and the Pn in the  
 224 brain are labeled by GFP. Scale bar: 10  $\mu$ m. (C) Experimental strategy for ablating the SC-  
 225 projected GABAergic RGCs (phase 1: Expressing FLP in the EYFP-labeled GABAergic  
 226 RGCs; phase 2: DTA expression via the FLP/FDIO system; phase 3: DTA-induced  
 227 apoptosis). The SC-projected GABAergic RGCs can be effectively eliminated. (D-G) With  
 228 the expanding looming stimulus at 2-20 degrees for 0.6 second, representative movement  
 229 traces of the control (VEH) and DTA-expressed (DTA+FLP) *vGAT-Cre* (top, E) and *Gad2-*  
 230 *Cre* (bottom, E) mice. F and G: quantification results on the movement distance and the time



231 interval from the start to the end point, respectively. **(H-J)** c-Fos positive cells in SC and PBG  
232 in looming stimulated control mice **(H)** and DTA+FLP treated mice **(I)**. **J**: quantification  
233 results on c-Fos positive cells in SC (top) and PBG (bottom) in each group of mice. Mann-  
234 Whitney U test; \*\*:  $P < 0.01$ , \*\*\*:  $P < 0.001$ , \*\*\*\*:  $P < 0.0001$ . Scale bar: 50  $\mu\text{m}$ .

235 **spgRGCs are dispensable for image forming functions and the pupillary light reflex**  
236 **(PLR)**

237 Electroretinography (ERG) and the optomotor response were used to investigate if  
238 spgRGCs are required for image-forming functions. There were no significant changes in the  
239 a-wave and b-wave amplitudes of scotopic ERGs between the control and ablation groups,  
240 indicating that spgRGCs are dispensable for overall retinal functions (Fig. 5A-B). The  
241 optomotor response was used to determine visual acuity based on head movements in  
242 response to the moving vertical grating stimulus. There was no significant difference in the  
243 visual acuity between the control and ablation groups (Fig. 5C-G). The PLR is characterized  
244 by a light-induced rapid pupil constriction followed by rapid partial re-dilation at light  
245 offset<sup>50</sup>. Similarly, there was no significant difference in light-triggered pupillary constriction  
246 between the control and ablation groups (Fig. 5H and 5I). Therefore, these results indicate  
247 that spgRGCs are not required for visual image formation and PLR.

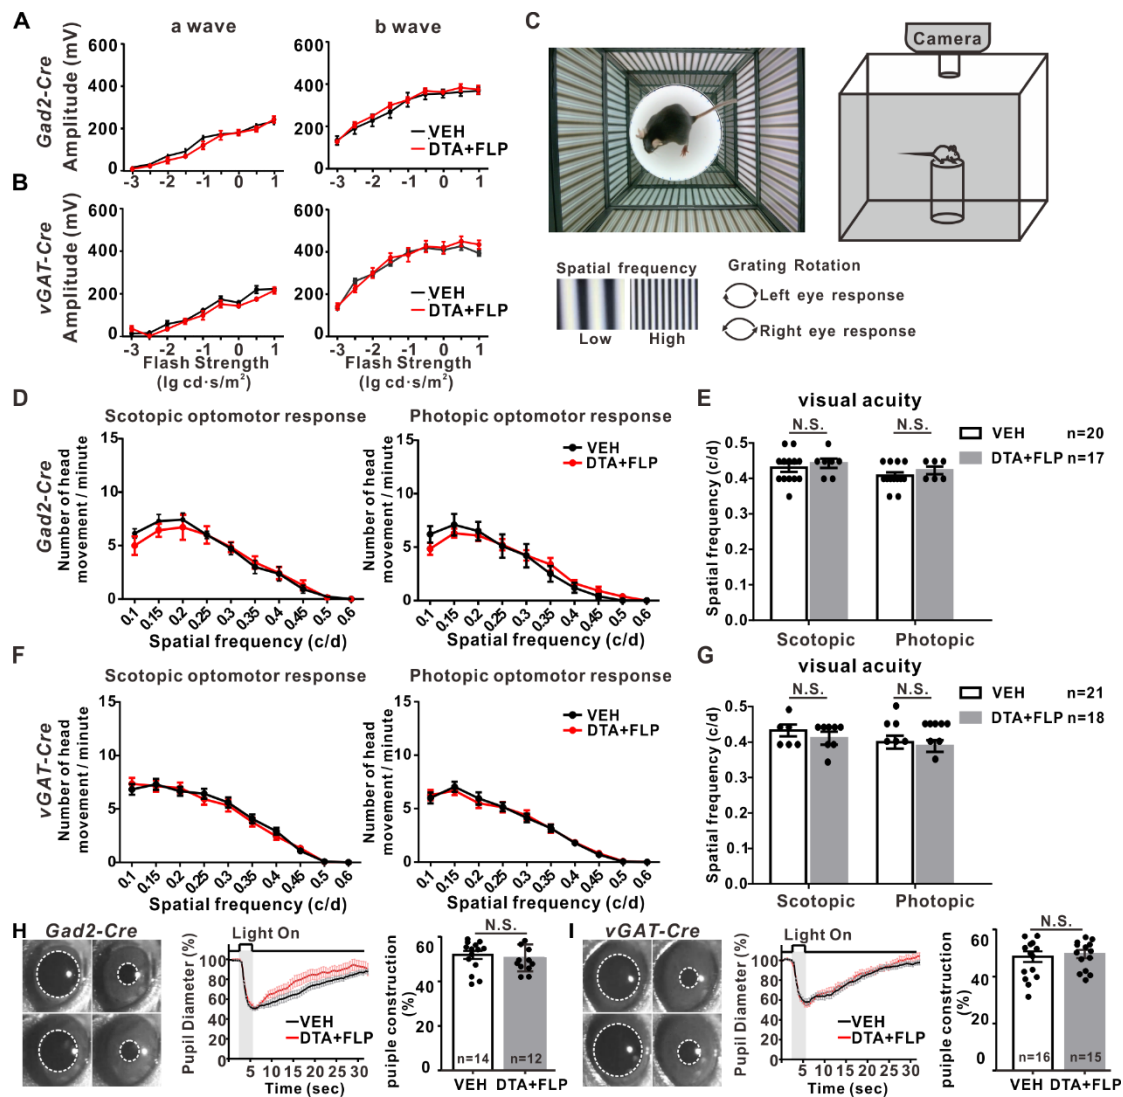

248 **Figure 5.** spgRGCs are dispensable for innate visual functions. (**A, B**) ERG amplitudes of a-  
 249 wave (left) and b-wave (right) show no significant changes in the ablation groups. (**C-G**) A  
 250 grating stimulation-based OMR setup (**C**), there are no significant differences on the  
 251 optomotor response (**D, F**) and the maximum spatial frequency (visual acuity; **E, G**) under  
 252 scotopic and photopic conditions in the control or DTA+FLP induced ablation groups. (**H, I**)  
 253 There are no significant changes on the pupil diameters of *Gad2-Cre* (**H**) and *vGAT-Cre* (**I**)  
 254 mice in response to chromatic light stimulation (blue light: 300 lux, 3 s) following the  
 255 ablation of spgRGCs. Left: infrared images; middle: traces of pupil diameter changes

256 following light stimulation; Right: pupil constriction (% of the pupil diameters before light  
257 simulation).

## 258 **GABA released from the spgRGCs govern the looming-evoked flight response**

259 Aiming at removing the effect of ablating spgRGCs on the structural integrity of neural  
260 circuits, adeno-associated virus (AAV) with short hairpin (shRNA) against vGAT was adopted  
261 to knock down vGAT expression by injecting rAAV-U6-Loxp-CMV-EGFP-SV40-polyA-  
262 Loxp-shRNA(vGAT shRNA group) into the vitreous of the *vGAT-Cre* mice (Fig. 6A). In order  
263 to assess the effectiveness and tissue-specificity of the *vGAT-Cre* combining with LoxP-  
264 shRNA system, western blot analysis indicated that the system was in position to efficiently  
265 silence vGAT in retina. Retina transfected with vGAT shRNA in two months manifested an  
266 inferior expression of vGAT protein to the Control (scramble shRNA group) (Fig. 6B).  
267 Afterwards, the looming behavior produced by knockdown vGAT in the spgRGCs was  
268 compared, vGAT shRNA group conveyed an increased escape latencies and duration during  
269 the trials in contrast with the Control group (Fig. 6C-D, Supplemental Movie 5-6). In  
270 addition, there was no significant diversity between the Control shRNA and the vGAT shRNA  
271 group in the optomotor response (Fig. S3). In a word, findings mentioned above demonstrate  
272 that functional release of GABA from spgRGCs are required for the looming-evoked flight  
273 response (L. Huang et al., 2017).

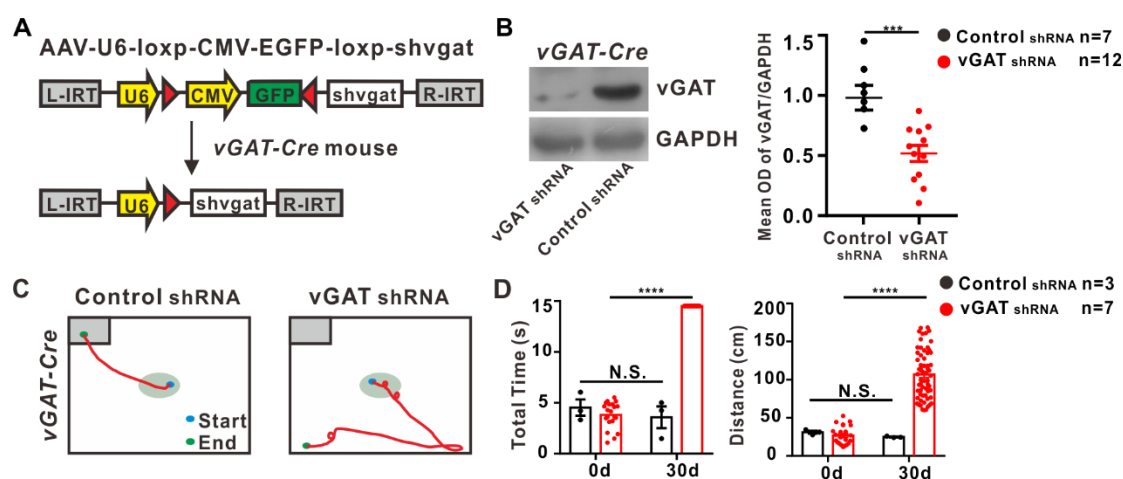

274 **Figure 6.** Looming-evoked flight response requires functional release of GABA from  
 275 spgRGCs. **(A)** The hairpin (sh) oligonucleotide (sholigo), targeting the vGAT transcript, was  
 276 used to knock down vGAT expression. **(B)** Western blot analysis show that it can efficiently  
 277 knockdown vGAT. Representative immunoreactive bands of vGAT protein levels, the bottom  
 278 panel show the mean optical density (OD) of the band corresponding to vGAT normalized to  
 279 GAPDH in the two groups. **(C-D)** Typical movement traces of the Control shRNA and vGAT  
 280 shRNA groups. **(D)** Before or 30 days after injection. Quantification results on the movement  
 281 distance and the time interval from the start to the end point, respectively. Mann-Whitney U  
 282 test; \*\*\*:  $P < 0.001$ , \*\*\*\*:  $P < 0.0001$ .

## 283 **Discussion**

284       The ability to detect rapidly approaching objects, which mimic predators, is a highly  
285 conserved innate defensive behavior in *Drosophila*, naïve rodents (Blanchard, Mast, &  
286 Blanchard, 1975) and primates (Wiener & Levine, 1992). Although the looming-evoked  
287 neural circuits in the mouse brain have been nicely studied, it remains poorly understood how  
288 the visual looming stimulus is transmitted from the retina to the brain. Here, we show that  
289 mouse spgRGCs directly innervate PV<sup>+</sup> SC neurons to mediate the looming-evoked flight  
290 behavior through the SC-PBGN pathway. In the adult mouse retina, GABAergic RGCs  
291 project their axons to multiple brain areas, including SC, SCN, OPN and LGN. Moreover,  
292 approximately 13% RGCs are GABAergic and belong to ON, OFF and ON-OFF RGC  
293 subtypes. In addition, the SC-projected GABAergic RGCs can release the inhibitory GABA  
294 to their mono-synapsed SC neurons when activated. Finally, DTA-mediated ablation of those  
295 spgRGCs causes the loss of the looming-evoked flight response. Therefore, we identify a  
296 novel GABAergic RGC population in the mouse retina that projects and releases GABA to  
297 the SC, and have further demonstrated that spgRGCs function as a part of the neural circuitry  
298 mediating the looming-evoked defensive behavior.

299       In the mammalian eye, RGCs are the only cell type sending long axons to connect the  
300 retina to the brain. Earlier studies suggest the existence of GABA-like immunoreactive RGCs  
301 in turtle (Hurd & Eldred, 1989) , bufo (Gabriel, Straznicky, & Wye-Dvorak, 1992) and rabbit

302 retinas (Yu et al., 1988). Since GABAergic neurons are believed to function within short  
303 distances to regulate local neural networks (Harris & Shepherd, 2015; Z. J. Huang, 2014;  
304 Kepecs & Fishell, 2014), the existence of GABAergic RGCs have not been taken seriously. In  
305 this study, we have provided three pieces of experimental evidence to demonstrate the  
306 existence of GABAergic RGCs in the adult mouse retina. First, *Gad2-Cre* and *vGAT-Cre*-  
307 driven Cre-dependent expression of EYFP reliably label RGCs that project axons to the brain.  
308 *Gad2* and *vGAT* (also known as *Slc32a1*) encode a GABA synthesizing enzyme and a  
309 vesicular GABA transporter, respectively, which are both known to be expressed in  
310 GABAergic neurons (Chan et al., 2017; Garcia-Junco-Clemente et al., 2017; Latremoliere et  
311 al., 2018). Consistently, those EYFP-labeled RGCs also express GABA. Second, by re-  
312 analyzing the recently published RGC SC-seq results (Kakizaki, Oriuchi, & Yanagawa,  
313 2015), we have found that 13% of RGCs express *Gad2*. Interestingly, most of the 40 RGC  
314 subgroups identified by SC-seq, including melanopsin-positive intrinsically photosensitive  
315 RGCs (ipRGCs), also express *Gad2* mRNA. Third, optogenetic activation drives EYFP-  
316 labeled RGCs to release GABA and elicit the IPSC responses in the projected SC neurons,  
317 indicating that those EYFP-labeled RGCs are bona fide GABAergic neurons. Finally, our  
318 AAV-mediated tracing experiments have shown that those EYFP-labeled GABAergic RGCs  
319 project their axons to the four major brain regions, SCN, OPN, LGN and SC. The SCN and  
320 OPN brain areas are required for non-image-forming functions, circadian photoentrainment  
321 (Brown et al., 2010; Ecker et al., 2010; Hattar et al., 2006), and the pupillary light reflex  
322 (PLR) (Bonmati-Carrion et al., 2016), respectively. The LGN is required for visual image-

323 forming functions, whereas the SC is required for both non-image-forming and image-  
324 forming functions (Marcelja, 1979; Sylvester, Haynes, & Rees, 2005). Taken together,  
325 multiple types of GABAergic RGCs exist in the adult mouse retina and likely have distinct  
326 biological functions.

327 This study functionally demonstrates that spgRGCs participate in the looming-evoked  
328 innate flight response via the SC-PBGN pathway. Based on stratification within the IPL and  
329 light-mediated responses, spgRGCs are composed of ON, OFF and ON-OFF types. Those  
330 spgRGCs primarily target the superficial and intermediate layers of the SC, which are known  
331 to be required for the looming-evoked defensive behavior (Ito & Feldheim, 2018; Liang et al.,  
332 2015). Indeed, DTA-mediated ablation of spgRGCs diminishes the looming-evoked flight  
333 response, but does not affect image-forming and other non-image-forming functions. Dual  
334 SC/DRN-projected RGCs have been previously identified for the looming-evoked flight  
335 response (L. Huang et al., 2019). Since newly identified spgRGCs do not project to the DRN,  
336 SC/DRN-projected RGCs and spgRGCs represent two distinct RGC populations for  
337 mediating the looming-evoked flight response. Our trans-synaptic tracing results indicate that  
338 the GABAergic RGC-projecting SC neurons are also PV<sup>+</sup> and are capable of innervating  
339 PBGN, PN and DLG in the brain, which should be the same as the previously identified PV<sup>+</sup>  
340 glutamatergic SC neurons (Shang et al., 2015). Those PV<sup>+</sup> SC neurons activate the PBGN-  
341 amygdala circuitry to control the looming-evoked flight response (Shang et al., 2019; Shang  
342 et al., 2015). Our c-Fos expression results also support that spgRGCs activate PV<sup>+</sup> SC and

343 PGBN neurons to mediate the looming-evoked flight response. Therefore, this study shows  
344 that spgRGCs are mono-synaptically connected to the SC-PGBN circuitry for mediating the  
345 looming-evoked flight behavior through GABA. This study has also opened the door for  
346 studying other biological functions of GABAergic RGCs.

## 347 **Materials and Methods**

### 348 **Animals**

349 The mouse strains used: C57BL/6, *vGAT-Cre* [B6J.129S6(FVB)-*Slc32a1*<sup>tm2(cre)Lowl</sup>/*MwarJ*;  
350 Jackson Laboratory] and *Gad2-Cre* (B6J.Cg-*Gad2*<sup>tm2(cre)Zjh</sup>/*MwarJ*; Jackson Laboratory). All  
351 mice were group-housed and maintained on a 12h light/12h dark cycle with food and water  
352 provided *ad libitum*. 6-8-week old adult males were randomly divided into experimental and  
353 control groups. All the experiments were done in accordance with the guidelines of Wuhan  
354 University Institutional Animal Care Committee.

### 355 **Stereotaxic injection of AAV and HSV**

356 For cell-type-specific retrograde tracing, animals were first anesthetized by intraperitoneally  
357 injecting ketamine and xylazine (60 and 16 mg/kg body weight, respectively). Following the  
358 making of a small craniotomy hole by a dental drill (OmniDrill35, WPI), a micropipette  
359 controlled by a Quintessential Stereotaxic Injector system (Stoelting, Wood Dale, IL, USA,  
360 Micro4; WPI, Sarasota, USA) was used to inject 700 nl *AAV2/retro-EF1a-DIO-EYFP-EYFP-*



361 *WPRE-pA* ( $6.48 \times 10^{12}$  vg/ml, BrainVTA, Wuhan) virus into the SC of control, *Gad2-Cre* and  
362 *vGAT-Cre* mice. Coordinates targeting the SC were as follows: 3.9 mm back from the bregma  
363 (anteroposterior), 0.45 mm lateral to the midline (mediolateral), and 1.7 mm deep  
364 (dorsoventral) below the pial surface. The pipette was held in place for 10 min, and  
365 then withdrawn slowly (Gauvain & Murphy, 2015).

366 For anterograde RGCs tracing, a small incision was made in the conjunctiva to expose the  
367 sclera, and 1.5  $\mu$ l of *AAV2/2-EF1 $\alpha$ -DIO-EYFP-EYFP-WPRE-pA* ( $2.12 \times 10^{12}$  vg/ml,  
368 BrainVTA, Wuhan) suspension was injected into the center of the vitreous cavity through the  
369 ora serrata with a Hamilton syringe (Hamilton Company, Reno, NV). For anterograde trans-  
370 synaptic tracing, 1.5  $\mu$ l of *HSV-LSL-TK-G4* ( $1 \times 10^{10}$  vg/ml) suspension was injected into the  
371 vitreous chamber, and brain slice were obtained at 6 days (Lo & Anderson, 2011). For  
372 ablating SC-projecting GABAergic RGCs, two viruses were performed sequentially. 700 nl of  
373 *AAV2/retro-EF1 $\alpha$ -DIO-FLP-WPRE-pA* ( $7.33 \times 10^{12}$  vg/ml, BrainVTA, Wuhan) was first  
374 injected into the SC of *vGAT-Cre/Gad2-Cre* mice, and 1.5  $\mu$ l of *AAV2/2-EF1 $\alpha$ -FDIO-DTA-*  
375 *WPRE-pA* ( $6.2 \times 10^{12}$  vg/ml, BrainVTA, Wuhan) or PBS (as a control) was then injected into  
376 the vitreous chamber bilaterally 3 days later. GABAergic RGC degeneration were detected  
377 after one month (Gauvain & Murphy, 2015; Hu et al., 2017). All the experiments with viruses  
378 were performed in bio-safety level 2 (BSL-2) laboratory and animal facilities.

379 To remove the putative GABAergic regulation on looming-evoked flight response from  
380 spgRGCs, we used vGAT-selective short hairpin (shRNA) constructs to knock down vGAT  
381 expression in the retina by injecting vectors into the vitreous of the *vGAT-Cre* mice. The  
382 modified U6 promoter harbors a LoxP-CMV-EGFP-LoxP inside. When the vGAT positive cell  
383 was coinfecting with LoxP-shRNA vectors, Cre-mediated recombination results in subsequently  
384 cutting the LoxP-CMV-eGFP-LoxP inside the U6 promoter and activates the U6 promoter. The  
385 activated U6 promoter then drives the down-stream shRNA expression and silences the target  
386 gene. rAAV-U6-Loxp-CMV-EGFP-SV40-polyA-Loxp-shRNA(shvgat) and rAAV-U6-Loxp-  
387 CMV-EGFP-Loxp-shRNA(scramble/Control) were injected into the vitreous chamber. AAVs  
388 carrying an shRNA outside two loxP sites (AAV-U6-LoxP-CMV-GFP-LoxP-shRNA,  $6.3 \times 10^{12}$   
389 vg/ml) (BrainVTA, Wuhan) were used for Cre-dependent silencing of vGAT in the *vGAT-Cre*  
390 mice. The shRNA oligonucleotides for targeting vGAT mRNA (shvgat; 5'-TGCTGTTG  
391 ACAGTGAGCGCGGTGTGCTCGTGGTGAATAAGTAGTGAAGCCACAGATGTACTTAT  
392 TCACCACGAGCACACCATGCCTACTGCCTCGGA-3') and control shRNA (Control; 5'  
393 -TGCTGTTGACAGTGAGCGGCCGCGATTAGGCTGTTATAATAGTGAAGCCACAGAT  
394 GTATTATAACAGCCTAATCGCGGCTGCCTACTGCCTCGGA-3') were created following  
395 the information described in the literature (Gangadharan et al., 2016; Peng et al., 2013;  
396 Stegmeier, Hu, Rickles, Hannon, & Elledge, 2005). Control shRNA sequences were used to  
397 construct a non-targeting control virus. Mice were given injections of either vGAT shRNA or  
398 non-targeting scramble shRNA (Control shRNA).

399 **Histological procedures**

400 For retina whole mounts, eyes were enucleated after cervical dislocation, and eye cups were  
401 fixed in 4% paraformaldehyde (PFA; pH 7.4) at room temperature for 40 min (Jain et al.,  
402 2016). Retina was isolated from the eye cup and flattened. For retina cryosections, eyecups  
403 were fixed in 4% paraformaldehyde for 40 min, washed with PBS three times for 5 minutes,  
404 incubated sequentially for 1 h in 10% and 20% sucrose, overnight in 30% sucrose. Then the  
405 eyes were embedded in O.C.T compound (Sakura Finetek, Japan) and frozen at -80°C.  
406 Retinal sections were cut at 14 µm thickness on a freezing microtome (Leica, CM1950,  
407 Germany) and mounted on gelatin-coated slides (Chen, Luo, Liu, & Shen, 2018). For brain  
408 cryosections, after transcranial perfusion with 0.9% saline followed by 4% paraformaldehyde  
409 in 0.1 M of PBS, the brain was removed and post-fixed with 4% paraformaldehyde for 1 day  
410 at 4 °C, then transferred into a 30% sucrose solution for 3 days until sectioning with a  
411 cryostat. A series of 50 µm sections were collected for staining.

412 **Immunostaining**

413 The procedures of immunohistochemistry refer to the previous work (Kircher, Crippa, Martin,  
414 Kawasaki, & Kostic, 2019) (the retina and brain slices were first incubated for 2 hours in a  
415 blocking solution containing 5% bovine serum albumin (BSA), and 0.2% Triton X-100 in  
416 PBS (pH 7.4). And then incubated in primary antibodies at 4°C overnight. After washing with  
417 PBS for 3x15 min, the samples were incubated in the appropriate secondary antibodies for 2  
418 hours at room temperature. The samples were washed again in PBS for 3x15 min and

419 mounted in DAPI (4-,6-diamidino-2-phenylindole; Life Technologies, D1306) for 5 min. The  
420 antibodies used in this work were list as follows: chicken polyclonal antibody against GFP for  
421 immunolabeling EYFP+/GFP+ neurons (1:2000, Abcam, ab13970); mouse polyclonal  
422 antibody against Brn3a (1:500, Millipore, MAB1585); goat polyclonal antibody against  
423 ChAT (1:200, Millipore, AB144P); rabbit polyclonal antibody against GABA (1:200, Sigma,  
424 A2052), rabbit polyclonal antibody against c-Fos (1:500; PC38T, Calbiochem). Secondary  
425 antibodies were anti-isotypic Alexa Fluor conjugates (1:1000, Invitrogen), incubation for 2 h  
426 at room temperature, and after washes in PBS, the retinas were subsequently mounted in  
427 antifade mounting medium.

#### 428 **Confocal microscopy and three-dimensional reconstruction**

429 Images were collected with a confocal laser-scanning microscope (Leica, SP8). For three-  
430 dimensional reconstruction of injected or virus labelled RGCs, the Z-axis interval was set at  
431 0.4  $\mu\text{m}$  and areas of interest were scanned with a 100X oil immersion objective. A montage of  
432 optical section stacks was created, projected to a 0° X-Y plane and a 90° X-Z plane to obtain  
433 a 3-D reconstruction. Each stack of optical sections covered a retinal area of 325.75 x 325.75  
434  $\mu\text{m}^2$  (1,024x1,024 pixels). Details of three-dimensional reconstruction and confocal  
435 calibration procedures were described elsewhere (Ren et al., 2013). Contrast and brightness  
436 were adjusted. Total soma and dendritic field size of each filled cell were analyzed.

437 **Electrophysiological recording on tissue slices**

438 Brain slices containing the SC were prepared according to the procedures described  
439 previously (L. Huang et al., 2019). In brief, mice were anesthetized with isoflurane. After  
440 decapitation, brains were immediately immersed in ice-cold oxygenated (95% O<sub>2</sub> and 5%  
441 CO<sub>2</sub>) cutting solution which containing (in mM): Choline chloride 97, Ascorbic acid 11, KCl  
442 2.5, NaHCO<sub>3</sub> 25, NaH<sub>2</sub>PO<sub>4</sub> 1.26, Sodium Pyruvate 3, CaCl<sub>2</sub> 0.5, MgCl<sub>2</sub> 7.2, glucose 25. Brain  
443 slices (350 μm) was cut using a vibratome (VT1200S, Leica, Germany). The slices were  
444 incubated in 34°C artificial cerebrospinal fluid (ACSF: NaCl 118, KCl 2.5, CaCl<sub>2</sub> 2, NaH<sub>2</sub>PO<sub>4</sub>  
445 1, MgCl<sub>2</sub> 2, NaHCO<sub>3</sub> 26 and glucose 22 in mM) and bubbled with 95% O<sub>2</sub> and 5% CO<sub>2</sub> for 30  
446 minutes before transfer to the recording chamber. After an hour incubation at room  
447 temperature (25°C), slice was transferred to the recording chamber, visualized with an X40  
448 water immersion lens, DIC optics (BX51WI, Olympus, Japan) and a CCD camera (IR1000,  
449 DAGE-MTI, USA). The data were digitized and recorded on-line using Clampex 10.6 (Axon  
450 Instruments, Molecular Devices). Signals were amplified by MultiClamp 700B (Molecular  
451 Devices), filtered at 1 kHz and sampled at 10 kHz. Electrodes were fabricated from borosilicate  
452 glass (Sutter instrument) using a pipette puller (Sutter, P1000); with resistance 5-7 MΩ. The  
453 internal solution for the recording glass pipette was (in mM): Cs-methanesulfonate 115, CsCl  
454 20, HEPES 10, MgCl<sub>2</sub> 2, ATP-Mg 4, GTP-Na 0.4, Na-phosphocreatine 10, EGTA 0.6 (pH 7.2  
455 adjusted by CsOH, mOsm 290). After establishing the whole-cell configuration, the holding  
456 potential was maintained at 0 mV and GABA receptor-mediated IPSCs were pharmacologically  
457 isolated using an antagonist cocktail (D-AP5 50 μM; strychnine 10 μM, CNQX 10 μM and

458 TTX 1  $\mu$ M)(Yang & Ma, 2011). ChR2-induced synaptic current was recorded while holding at  
459 -70 mV. The external solution contained NaCl 125, KCl 2.5, CaCl<sub>2</sub> 2, MgSO<sub>4</sub> 1, NaHCO<sub>3</sub> 26,  
460 NaH<sub>2</sub>PO<sub>4</sub> 1.25 and Glucose 20. All drugs were obtained from Sigma-Aldrich or Tocris  
461 Bioscience.

462 For light stimulation, an optic fiber was positioned right above the slice (Mightex, BioLED  
463 Light). Synchronized light-evoked response was triggered by Clampex 10 to deliver light  
464 pulses (470 nm, 5 ms, 0.05 Hz). For retinal slice recording, the isolated retinas were cut into  
465 15- $\mu$ m-thick slices in Ringer's using a manual cutter (ST-20, Narishige, Japan). The slices  
466 were transferred into a recording chamber with the cut side up and held in place with vaseline.  
467 Whole-cell recordings were obtained from selected neurons. ChR2 positive GABAergic  
468 neurons was confirmed by enhanced yellow fluorescent protein (eYFP) labeling.

#### 469 **Looming stimulation test**

470 The looming stimulation test was performed in an open-top acrylic box, as described by  
471 Huang L, et al (L. Huang et al., 2017) . The arena had dim lighting from the screen of the  
472 monitor. The floor and three walls were covered with a frosted coating to prevent reflections  
473 of the stimulus. A camera from the side was used to track the movements. An LED monitor  
474 was embedded in the ceiling to present the looming stimulus. The stimulus program was  
475 displayed on a LED monitor (HPZ24i). The looming stimulus, which consisted of an  
476 expanding black disc, appeared at a diameter of a visual angle from 2° to 20° in 0.6 s, for 15

477 times in 14.6 s. The stimulation was initiated manually when the mouse was in the center of  
478 the arena (Hu et al., 2017; L. Huang et al., 2017; Yilmaz & Meister, 2013). Looming tests  
479 were conducted in Control mice (n=22 for *Gad2-Cre* mice; 28 for *vGAT-Cre* mice) and  
480 DTA+FLP mice (n=43 for *Gad2-Cre* mice; 35 for *vGAT-Cre* mice).

#### 481 **Optomotor response**

482 Optomotor responses of animals in Control (n=20 for *Gad2-Cre* mice; n=21 for *vGAT-Cre*  
483 mice) and DTA+FLP (n=17 for *GAD-Cre* mice; n=18 for *vGAT-Cre* mice) groups were  
484 measured as described (Abdeljalil et al., 2005). Briefly, mice were placed on a platform (9 cm  
485 diameter, 17.5 cm above the bottom of the mirror) surrounded by four LCD screens (Lenovo,  
486 L1900 PA) that displayed rotating black-and-white stripes at various spatial frequencies. The  
487 platform was set in the middle of the arena for mouse to stand and move freely. Stimuli were  
488 presented on four computer screens surrounding the animal covering the whole field of view  
489 with a texture projected onto the surface of a virtual sphere. Mice were videotaped with a  
490 camera mounted on top of the platform for subsequent scoring of head tracking movements.  
491 Animals were dark-adapted for 3-4 hours, and then presented with vertical black and white  
492 stripes of a defined spatial frequency. These stripes were rotated alternately clockwise and  
493 anticlockwise for 30 s in each direction and paused for 10 s. The animals were tested with  
494 spatial frequencies increasing from 0.1 to 0.6 cycles per degree (cyc/deg): 0.1, 0.15, 0.2, 0.25,  
495 0.3, 0.35, 0.4, 0.45, 0.5 and 0.6 cyc/deg. Procedures for measuring optomotor responses under

496 photopic condition were similar to the scotopic condition except that animals were subjected  
497 to 400 Lux light stimulus for 10 mins to allow them to adapt to the light.

#### 498 **Pupillary light reflex**

499 Mice were dark-adapted overnight and tested in a dark room. Mice were unanesthetized and  
500 restrained by hand. We handled the mice for several days prior to the experiments to get them  
501 accustomed to the tester and make sure the animal calming during the experiments as stress  
502 might affect the pupil size (Kostic et al., 2016). Any mice that showed signs of stress,  
503 including vocalizations and wriggling during the experiments, we will suspend the recording  
504 and comfort the animal until they are calm again. The light stimulus was conducted by a LED  
505 light (470 nm, 3s, Mightex BioLED Light). The changes of pupil size were monitored by an  
506 infrared camera (IR1000, DAGE-MTI, USA). The recording started 2.5 s before the light  
507 stimulus and continued for 30 s after the stimulus. The images were made grayscale and then  
508 brightness and contrast were adjusted to enhance visibility of the pupil and exported. Pupil  
509 diameters were converted to a percentage of the baseline. The averaged response from pupil  
510 recordings (Control: n=14 for *Gad2-Cre*, n=16 for *vGAT-Cre* mice; DTA+FLP: n=12 for  
511 *Gad2-Cre*, n=15 for *vGAT-Cre* mice) was calculated and plotted through GraphPad Prism 6  
512 software (GraphPad Software, Inc., San Diego, CA, USA).



513 **Electroretinography**

514 Retinal functions of control (n=16 for *Gad2-Cre* and *vGAT-Cre*) and DTA+FLP (n=24 for  
515 *Gad2-Cre* and *vGAT-Cre*) mice were measured with a commercial ERG system (RetiMINER,  
516 China). After overnight dark adaptation (Mees et al., 2019), the mice were anesthetized by  
517 intraperitoneally injecting ketamine and xylazine (60 mg/kg and 16 mg/kg bodyweight,  
518 respectively), and then lightly secured to a stage with fastener strips across the back to ensure  
519 a stable, reproducible position for ERG recordings. All procedures were performed under dim  
520 red light. Customized gold-loop wire electrodes were placed on the center of each eye to  
521 measure the electrical response of the eye to flash stimulation. Reference electrodes were  
522 placed subcutaneously between the ears and a ground electrode was placed in the base of the  
523 tail. The ERG consisted of a 9-step series of full-field flash stimuli dark-adapted (-3 to 1 lg  
524 cd·s/m<sup>2</sup>) conditions. After the ERG recording, erythromycin was used on the ocular surface,  
525 and the animals were allowed to recover on a heating pad (Su et al., 2016).

526 **Western blotting**

527 Western blotting was performed according to previous work on retinal extracts (Chen et al.,  
528 2018). They were homogenized with RIPA lysis buffer (Thermo Scientific, USA) supplemented  
529 with a PMSF (Servicebio, Wuhan). Protein concentration in the supernatant was measured  
530 using BCA Protein Assay kit (Servicebio, Wuhan). Proteins (40 µg) in retinal samples were  
531 resolved by 10% sodium dodecyl sulphate polyacrylamide gel electrophoresis (SDS-PAGE)  
532 and transferred onto and electro-blotted to nitro-cellulose membranes (Millipore, USA). The

533 membranes were subsequently blocked with 5% nonfat milk for one hour and incubated  
534 overnight at 4 °C with primary antibodies, including rabbit anti-SLC32A1 (1:1000; Absin,  
535 abs136723), rabbit anti-GAPDH (1:6000; Antgene, ANT012). The membranes were washed  
536 for 30 min in TBS-Tween 20 and incubated with HRP-conjugated goat anti-rabbit IgG (1:5000,  
537 Servicebio) for 2 h at RT. After the second antibody, the membranes were washed again and  
538 immunoreactive bands were subsequently detected using ECL reagents and recorded by X-ray  
539 films.

#### 540 **Data quantification and statistical Analysis**

541 All experiments were performed with anonymized samples in which the experimenter was  
542 unaware of the experimental condition of mice. Statistical analysis was performed using SPSS  
543 software (IBM, Armonk, NY, USA). Unpaired *t-test* or Mann-Whitney U test were used.  
544 Error bars represent the mean  $\pm$  standard error of mean (SEM).  $p < 0.05$  is considered as  
545 significant difference between two samples (Chen et al., 2018; Dinculescu et al., 2016).

#### 546 **Author Contributions**

547 Conception and design of the experiments: Y. Shen and X. Luo. Performed the experiments:  
548 X. Luo, Q. Deng, D. Cai and K. Shen. Analysis and interpretation of data: Y. Shen, T. Xie, X.  
549 Luo, D. Cai, K. Shen and H. Li. Wrote the paper: T. Xie, Y. Shen, and X. Luo. All authors  
550 approved the final version for publication.

551 **Acknowledgments**

552 This work was supported by grants from the National Key R&D Program of China  
553 (2017YFE013400 to Y.S.), the National Nature Science Foundation of China (81470628 Y. S.  
554 81800872 to Q.D.) and The Stowers SIMR fund (to T. X.).

555 **Conflict of interest**

556 The authors of this work do not have any conflicts of interest.

557 **References**

- Abdeljalil J., Hamid M., Abdel-Mouttalib O., Stephane R., Raymond R., Johan A., Jose S., Pierre C., & Serge P. (2005). The optomotor response: a robust first-line visual screening method for mice. *Vision Res.*, 45(11), 1439-1446. doi:10.1016/j.visres.2004.12.015
- Baden T., Berens P., Franke K., Roman Roson M., Bethge M., & Euler T. (2016). The functional diversity of retinal ganglion cells in the mouse. *Nature*, 529(7586), 345-350. doi:10.1038/nature16468
- Ball W., & Tronick E. (1971). Infant responses to impending collision: optical and real. *Science*, 171(3973), 818-820. doi:10.1126/science.171.3973.818
- Blanchard R. J., Mast M., & Blanchard D. C. (1975). Stimulus control of defensive reactions in the albino rat. *J Comp Physiol Psychol*, 88(1), 81-88. doi:10.1037/h0076213
- Bonmati-Carrion M. A., Hild K., Isherwood C., Sweeney S. J., Revell V. L., Skene D. J., Rol M. A., & Madrid J. A. (2016). Relationship between Human Pupillary Light Reflex and Circadian System Status. *PLoS One*, 11(9), e0162476. doi:10.1371/journal.pone.0162476
- Brown T. M., Gias C., Hatori M., Keding S. R., Semo M., Coffey P. J., Gigg J., Piggins H. D., Panda S., & Lucas R. J. (2010). Melanopsin contributions to irradiance coding in the thalamo-cortical visual system. *PLoS Biol.*, 8(12), e1000558. doi:10.1371/journal.pbio.1000558
- Chan K. Y., Jang M. J., Yoo B. B., Greenbaum A., Ravi N., Wu W. L., Sanchez-Guardado L., Lois C., Mazmanian S. K., Deverman B. E., & Gradinaru V. (2017). Engineered AAVs for efficient noninvasive gene delivery to the central and peripheral nervous systems. *Nat. Neurosci.*, 20(8), 1172-1179. doi:10.1038/nn.4593
- Chen Y., Luo X., Liu S., & Shen Y. (2018). Neuroprotective effect of cannabinoid receptor 1 antagonist in the MNU-induced retinal degeneration model. *Exp. Eye Res.*, 167, 145-151. doi:10.1016/j.exer.2017.11.001
- Chou X. L., Wang X., Zhang Z. G., Shen L., Zingg B., Huang J., Zhong W., Mesik L., Zhang L. I., & Tao H. W. (2018). Inhibitory gain modulation of defense behaviors by zona incerta. *Nat Commun*, 9(1), 1151. doi:10.1038/s41467-018-03581-6

- Collier R. J. (2001). Understanding the mode of action of diphtheria toxin: a perspective on progress during the 20th century. *Toxicon*, 39(11), 1793-1803. doi:10.1016/s0041-0101(01)00165-9
- Dinculescu A., Stupay R. M., Deng W. T., Dyka F. M., Min S. H., Boye S. L., Chiodo V. A., Abraham C. E., Zhu P., Li Q., Strettoi E., Novelli E., Nagel-Wolfrum K., Wolfrum U., Smith W. C., & Hauswirth W. W. (2016). AAV-Mediated Clarin-1 Expression in the Mouse Retina: Implications for USH3A Gene Therapy. *PLoS One*, 11(2), e0148874. doi:10.1371/journal.pone.0148874
- Ecker J. L., Dumitrescu O. N., Wong K. Y., Alam N. M., Chen S. K., LeGates T., Renna J. M., Prusky G. T., Berson D. M., & Hattar S. (2010). Melanopsin-expressing retinal ganglion-cell photoreceptors: cellular diversity and role in pattern vision. *Neuron*, 67(1), 49-60. doi:10.1016/j.neuron.2010.05.023
- Fang Y. Y., Yamaguchi T., Song S. C., Tritsch N. X., & Lin D. (2018). A Hypothalamic Midbrain Pathway Essential for Driving Maternal Behaviors. *Neuron*, 98(1), 192-207 e110. doi:10.1016/j.neuron.2018.02.019
- Gabriel R., Straznicky C., & Wye-Dvorak J. (1992). GABA-like immunoreactive neurons in the retina of *Bufo marinus*: evidence for the presence of GABA-containing ganglion cells. *Brain Res.*, 571(1), 175-179. doi:10.1016/0006-8993(92)90528-h
- Gangadharan G., Shin J., Kim S.-W., Kim A., Paydar A., Kim D.-S., Miyazaki T., Watanabe M., Yanagawa Y., Kim J., Kim Y.-S., Kim D., & Shin H.-S. (2016). Medial septal GABAergic projection neurons promote object exploration behavior and type 2 theta rhythm. *Proc. Natl. Acad. Sci. U.S.A.*, 113(23), 6550-6555. doi:10.1073/pnas.1605019113
- Garcia-Junco-Clemente P., Ikrar T., Tring E., Xu X., Ringach D. L., & Trachtenberg J. T. (2017). An inhibitory pull-push circuit in frontal cortex. *Nat. Neurosci.*, 20(3), 389-392. doi:10.1038/nn.4483
- Gauvain G., & Murphy G. J. (2015). Projection-specific characteristics of retinal input to the brain. *J. Neurosci.*, 35(16), 6575-6583. doi:10.1523/JNEUROSCI.4298-14.2015
- Gibson W. T., Gonzalez C. R., Fernandez C., Ramasamy L., Tabachnik T., Du R. R., Felsen P. D., Maire M. R., Perona P., & Anderson D. J. (2015). Behavioral responses to a repetitive visual threat stimulus express a persistent state of defensive arousal in *Drosophila*. *Curr Biol*, 25(11), 1401-1415. doi:10.1016/j.cub.2015.03.058
- Harris K. D., & Shepherd G. M. (2015). The neocortical circuit: themes and variations. *Nat. Neurosci.*, 18(2), 170-181. doi:10.1038/nn.3917
- Hattar S., Kumar M., Park A., Tong P., Tung J., Yau K. W., & Berson D. M. (2006). Central projections of melanopsin-expressing retinal ganglion cells in the mouse. *J. Comp. Neurol.*, 497(3), 326-349. doi:10.1002/cne.20970
- Hirano A. A., Brandstatter J. H., & Brecha N. C. (2005). Cellular distribution and subcellular localization of molecular components of vesicular transmitter release in horizontal cells of rabbit retina. *J Comp Neurol*, 488(1), 70-81. doi:10.1002/cne.20577
- Hu Y., Chen Z., Huang L., Xi Y., Li B., Wang H., Yan J., Lee T. M. C., Tao Q., So K. F., & Ren C. (2017). A translational study on looming-evoked defensive response and the underlying subcortical pathway in autism. *Sci Rep*, 7(1), 14755. doi:10.1038/s41598-017-15349-x
- Huang L., Xi Y., Peng Y., Yang Y., Huang X., Fu Y., Tao Q., Xiao J., Yuan T., An K., Zhao H., Pu M., Xu F., Xue T., Luo M., So K. F., & Ren C. (2019). A Visual Circuit Related to Habenula Underlies the

- Antidepressive Effects of Light Therapy. *Neuron*, 102(1), 128-142 e128.  
doi:10.1016/j.neuron.2019.01.037
- Huang L., Yuan T., Tan M., Xi Y., Hu Y., Tao Q., Zhao Z., Zheng J., Han Y., Xu F., Luo M., Sollars P. J., Pu M., Pickard G. E., So K. F., & Ren C. (2017). A retinoraphe projection regulates serotonergic activity and looming-evoked defensive behaviour. *Nat Commun*, 8, 14908.  
doi:10.1038/ncomms14908
- Huang Z. J. (2014). Toward a genetic dissection of cortical circuits in the mouse. *Neuron*, 83(6), 1284-1302. doi:10.1016/j.neuron.2014.08.041
- Hurd L. B., & Eldred W. D. (1989). Localization of GABA- and GAD-like immunoreactivity in the turtle retina. *Vis. Neurosci.*, 3(1), 9-20. doi:10.1017/s0952523800012463
- Ito S., & Feldheim D. A. (2018). The Mouse Superior Colliculus: An Emerging Model for Studying Circuit Formation and Function. *Front Neural Circuits*, 12, 10. doi:10.3389/fncir.2018.00010
- Jain V., Srivastava I., Palchadhuri S., Goel M., Sinha-Mahapatra S. K., & Dhingra N. K. (2016). Classical Photoreceptors Are Primarily Responsible for the Pupillary Light Reflex in Mouse. *PLoS One*, 11(6), e0157226. doi:10.1371/journal.pone.0157226
- Kakizaki T., Oriuchi N., & Yanagawa Y. (2015). GAD65/GAD67 double knockout mice exhibit intermediate severity in both cleft palate and omphalocele compared with GAD67 knockout and VGAT knockout mice. *Neuroscience*, 288, 86-93. doi:10.1016/j.neuroscience.2014.12.030
- Kepecs A., & Fishell G. (2014). Interneuron cell types are fit to function. *Nature*, 505(7483), 318-326. doi:10.1038/nature12983
- Kircher N., Crippa S. V., Martin C., Kawasaki A., & Kostic C. (2019). Maturation of the Pupil Light Reflex Occurs Until Adulthood in Mice. *Front. Neurol.*, 10, 56. doi:10.3389/fneur.2019.00056
- Kostic C., Crippa S. V., Martin C., Kardon R. H., Biel M., Arsenijevic Y., & Kawasaki A. (2016). Determination of Rod and Cone Influence to the Early and Late Dynamic of the Pupillary Light Response. *Invest Ophthalmol Vis Sci*, 57(6), 2501-2508. doi:10.1167/iovs.16-19150
- Latremoliere A., Cheng L., DeLisle M., Wu C., Chew S., Hutchinson E. B., Sheridan A., Alexandre C., Latremoliere F., Sheu S. H., Golidy S., Omura T., Huebner E. A., Fan Y., Whitman M. C., Nguyen E., Hermawan C., Pierpaoli C., Tischfield M. A., Woolf C. J., et al. (2018). Neuronal-Specific TUBB3 Is Not Required for Normal Neuronal Function but Is Essential for Timely Axon Regeneration. *Cell Rep*, 24(7), 1865-1879 e1869. doi:10.1016/j.celrep.2018.07.029
- Liang F., Xiong X. R., Zingg B., Ji X. Y., Zhang L. I., & Tao H. W. (2015). Sensory Cortical Control of a Visually Induced Arrest Behavior via Corticotectal Projections. *Neuron*, 86(3), 755-767. doi:10.1016/j.neuron.2015.03.048
- Lo L., & Anderson D. J. (2011). A Cre-dependent, anterograde transsynaptic viral tracer for mapping output pathways of genetically marked neurons. *Neuron*, 72(6), 938-950. doi:10.1016/j.neuron.2011.12.002
- Marcelja S. (1979). Initial processing of visual information within the retina and the LGN. *Biol. Cybern.*, 32(4), 217-226. doi:10.1007/bf00337645
- Mees L. M., Coulter M. M., Chrenek M. A., Motz C. T., Landis E. G., Boatright J. H., & Pardue M. T. (2019). Low-Intensity Exercise in Mice Is Sufficient to Protect Retinal Function During Light-Induced Retinal Degeneration. *Invest Ophthalmol Vis Sci*, 60(5), 1328-1335. doi:10.1167/iovs.18-25883

- Milstein A. D., Bloss E. B., Apostolides P. F., Vaidya S. P., Dilly G. A., Zemelman B. V., & Magee J. C. (2015). Inhibitory Gating of Input Comparison in the CA1 Microcircuit. *Neuron*, *87*(6), 1274-1289. doi:10.1016/j.neuron.2015.08.025
- Mitamura T., Higashiyama S., Taniguchi N., Klagsbrun M., & Mekada E. (1995). Diphtheria toxin binds to the epidermal growth factor (EGF)-like domain of human heparin-binding EGF-like growth factor/diphtheria toxin receptor and inhibits specifically its mitogenic activity. *J. Biol. Chem.*, *270*(3), 1015-1019. doi:10.1074/jbc.270.3.1015
- O'Sullivan M. L., Punal V. M., Kerstein P. C., Brzezinski J. A. t., Glaser T., Wright K. M., & Kay J. N. (2017). Astrocytes follow ganglion cell axons to establish an angiogenic template during retinal development. *Glia*, *65*(10), 1697-1716. doi:10.1002/glia.23189
- Pang J. J., & Wu S. M. (2011). Morphology and immunoreactivity of retrogradely double-labeled ganglion cells in the mouse retina. *Invest Ophthalmol Vis Sci*, *52*(7), 4886-4896. doi:10.1167/iovs.10-5921
- Peng Y.-F., Shi Y.-H., Ding Z.-B., Zhou J., Qiu S.-J., Hui B., Gu C., Yang H., Liu W.-R., & Fan J. (2013).  $\alpha$ -Fetoprotein promoter-driven Cre/LoxP-switched RNA interference for hepatocellular carcinoma tissue-specific target therapy. *PLoS One*, *8*(2), e53072. doi:10.1371/journal.pone.0053072
- Ren C., Luan L., Wui-Man Lau B., Huang X., Yang J., Zhou Y., Wu X., Gao J., Pickard G. E., So K. F., & Pu M. (2013). Direct retino-raphe projection alters serotonergic tone and affective behavior. *Neuropsychopharmacology*, *38*(7), 1163-1175. doi:10.1038/npp.2013.35
- Rheume B. A., Jereen A., Bolisetty M., Sajid M. S., Yang Y., Renna K., Sun L., Robson P., & Trakhtenberg E. F. (2018). Single cell transcriptome profiling of retinal ganglion cells identifies cellular subtypes. *Nat Commun*, *9*(1), 2759. doi:10.1038/s41467-018-05134-3
- Schiff W., Caviness J. A., & Gibson J. J. (1962). Persistent fear responses in rhesus monkeys to the optical stimulus of "looming". *Science*, *136*(3520), 982-983. doi:10.1126/science.136.3520.982
- Sernagor E., Eglén S. J., & Wong R. O. L. (2001). Development of retinal ganglion cell structure and function. *Prog. Retin. Eye Res.*, *20*(2), 139-174. doi:10.1016/s1350-9462(00)00024-0
- Shang C., Liu A., Li D., Xie Z., Chen Z., Huang M., Li Y., Wang Y., Shen W. L., & Cao P. (2019). A subcortical excitatory circuit for sensory-triggered predatory hunting in mice. *Nat. Neurosci.*, *22*(6), 909-920. doi:10.1038/s41593-019-0405-4
- Shang C., Liu Z., Chen Z., Shi Y., Wang Q., Liu S., Li D., & Cao P. (2015). BRAIN CIRCUITS. A parvalbumin-positive excitatory visual pathway to trigger fear responses in mice. *Science*, *348*(6242), 1472-1477. doi:10.1126/science.aaa8694
- Stegmeier F., Hu G., Rickles R. J., Hannon G. J., & Elledge S. J. (2005). A lentiviral microRNA-based system for single-copy polymerase II-regulated RNA interference in mammalian cells. *Proc. Natl. Acad. Sci. U.S.A.*, *102*(37), 13212-13217. doi:10.1073/pnas.0506306102
- Su X., Tan Q. S., Parikh B. H., Tan A., Mehta M. N., Sia Wey Y., Tun S. B., Li L. J., Han X. Y., Wong T. Y., Hunziker W., Luu C. D., Owada Y., Barathi V. A., Zhang S. S., & Chaurasia S. S. (2016). Characterization of Fatty Acid Binding Protein 7 (FABP7) in the Murine Retina. *Invest Ophthalmol Vis Sci*, *57*(7), 3397-3408. doi:10.1167/iovs.15-18542

- Sun W., Li N., & He S. (2002). Large-scale morphological survey of mouse retinal ganglion cells. *J. Comp. Neurol.*, *451*(2), 115-126. doi:10.1002/cne.10323
- Sylvester R., Haynes J. D., & Rees G. (2005). Saccades differentially modulate human LGN and V1 responses in the presence and absence of visual stimulation. *Curr Biol*, *15*(1), 37-41. doi:10.1016/j.cub.2004.12.061
- Taniguchi H., He M., Wu P., Kim S., Paik R., Sugino K., Kvitsiani D., Fu Y., Lu J., Lin Y., Miyoshi G., Shima Y., Fishell G., Nelson S. B., & Huang Z. J. (2011). A resource of Cre driver lines for genetic targeting of GABAergic neurons in cerebral cortex. *Neuron*, *71*(6), 995-1013. doi:10.1016/j.neuron.2011.07.026
- Wiener S. G., & Levine S. (1992). Behavioral and physiological responses of mother and infant squirrel monkeys to fearful stimuli. *Dev. Psychobiol.*, *25*(2), 127-136. doi:10.1002/dev.420250205
- Yang K., & Ma H. (2011). Blockade of GABA(B) receptors facilitates evoked neurotransmitter release at spinal dorsal horn synapse. *Neuroscience*, *193*, 411-420. doi:10.1016/j.neuroscience.2011.07.033
- Yilmaz M., & Meister M. (2013). Rapid innate defensive responses of mice to looming visual stimuli. *Curr. Biol.*, *23*(20), 2011-2015. doi:10.1016/j.cub.2013.08.015
- Yu B. C., Watt C. B., Lam D. M., & Fry K. R. (1988). GABAergic ganglion cells in the rabbit retina. *Brain Res.*, *439*(1-2), 376-382. doi:10.1016/0006-8993(88)91498-9
- Zhang C., Kolodkin A. L., Wong R. O., & James R. E. (2017). Establishing Wiring Specificity in Visual System Circuits: From the Retina to the Brain. *Annu. Rev. Neurosci.*, *40*, 395-424. doi:10.1146/annurev-neuro-072116-031607
- Zhao X., Liu M., & Cang J. (2014). Visual cortex modulates the magnitude but not the selectivity of looming-evoked responses in the superior colliculus of awake mice. *Neuron*, *84*(1), 202-213. doi:10.1016/j.neuron.2014.08.037
- Zhou Z., Liu X., Chen S., Zhang Z., Liu Y., Montardy Q., Tang Y., Wei P., Liu N., Li L., Song R., Lai J., He X., Chen C., Bi G., Feng G., Xu F., & Wang L. (2019). A VTA GABAergic Neural Circuit Mediates Visually Evoked Innate Defensive Responses. *Neuron*. doi:10.1016/j.neuron.2019.05.027

558 Supplementary information is available at *elife*'s website.

559 **Supplemental Information**

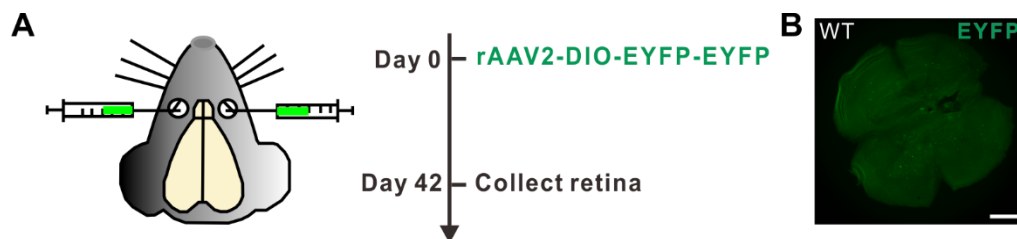

560 **Figure S1.** No virus-mediated labeling in control mice following *rAAV2-DIO-EYFP-*  
561 *EYFP* infection. (A) Experimental strategy for viral delivery. (B) No EYFP-positive  
562 cells are detected in the flat-mounted retina 42 days after virus infection, confirming  
563 the Cre-depended EYFP expression in this study. Scale bar: 100  $\mu$ m.

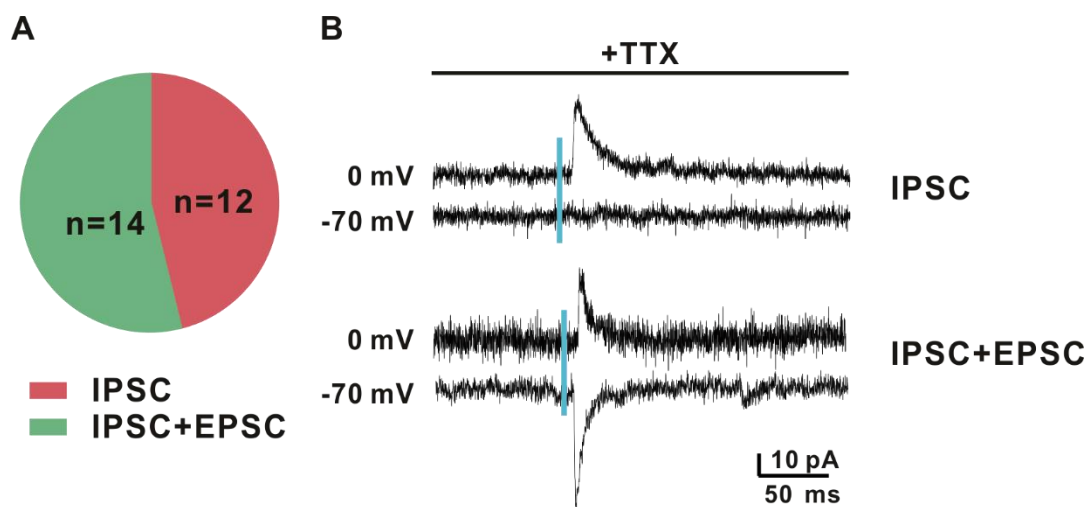

564 **Figure S2.** The properties of CHR2-induced currents. (A) IPSC-to-IPSC+EPSC ratios  
565 for ChR2<sup>+</sup> neurons are analyzed from *vGAT-Cre/Gad2-Cre* mice. (B) Example  
566 averaged traces of ChR2-evoked IPSC (**upper**) and IPSC+EPSC (**lower**). IPSC:  
567 ChR2 evoked excitatory ( $-70$  mV), but no inhibitory (0 mV) currents in the presence  
568 of TTX; IPSC+EPSC: ChR2-evoked excitatory ( $-70$  mV) and inhibitory (0 mV)  
569 currents in the presence of TTX.



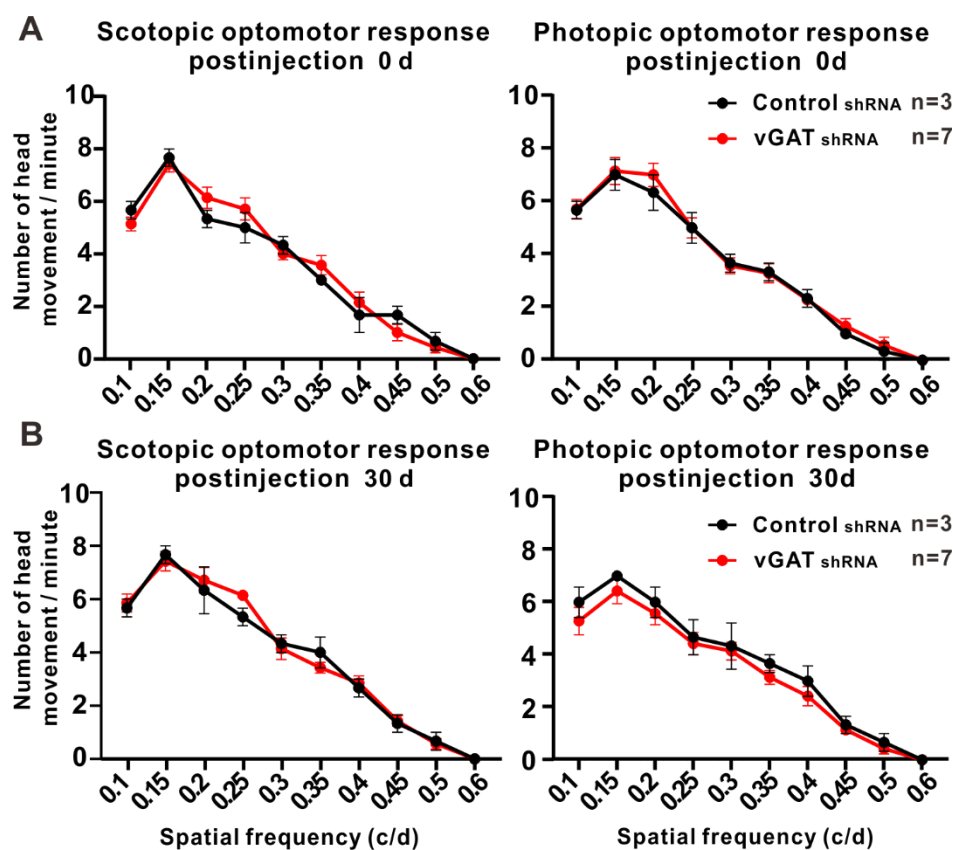

570 **Figure S3.** Functional release of GABA from spgRGCs are dispensable for the  
571 optomotor response. (A, B) Before or 30 days after injection, there are no significant  
572 differences on the optomotor response under scotopic and photopic conditions in the  
573 Control shRNA or vGAT shRNA group.

574 **Supplemental Movie 1**

575 Example of looming-evoked defensive behavior in *Gad2-Cre* mice.

576 **Supplemental Movie 2**

577 Example of looming-evoked defensive behavior in *vGAT-Cre* mice.

578 **Supplemental Movie 3**

579 Effects of spgRGCs deletion on looming-evoked flight response in *Gad2-Cre* mice.

580 **Supplemental Movie 4**

581 Effects of spgRGCs deletion on looming-evoked flight response in *vGAT-Cre* mice.

582 **Supplemental Movie 5**

583 Example of looming-evoked defensive behavior in vGAT shRNA group.

584 **Supplemental Movie 6**

585 Example of looming-evoked defensive behavior in Control shRNA group.
